# Supplementary material for: One-step preparation of boronic acid-rich hydrothermal spheres for N-glycopeptide analysis from preeclampsia serum
Source: Royal Society of Chemistry journal article supplement (doi:10.1039/d3ay00648d), 2023-01-01
Supplement: d3ay00648d1.pdf [file d3ay00648d1.pdf]

## Supporting Information

### Characterization

Deionized water was got through using Milli-Q IQ 7000. Scanning electron microscopy (SEM, Keol 2012 microscope), energy-dispersive X-ray spectroscopy (EDX, Keol 2012 microscope), Fourier transform infrared spectra (FT-IR, Thermo Fisher Scientific 10 infrared spectrometer analysis).

### Standard proteins digests pretreatment

HRP (2 mg) was added to deionized water (200  $\mu$ L) and denatured at 100°C for 10 min. After adding ammonium bicarbonate ( $\text{NH}_4\text{HCO}_3$ ) (50 mM, 0.5 mL) and trypsin (1 mg  $\text{mL}^{-1}$ , 0.25 mL), HRP was digest at 37°C for 16h.

According to the classic method, BSA was pretreated with DTT and IAA. BSA (50 mg) dispersed in  $\text{NH}_4\text{HCO}_3$  (50 mM, 2.5mL) was boiled and denatured at 100°C for 10 minutes. Then a mixed solution of DTT (200 mM, 0.25 mL) and  $\text{NH}_4\text{HCO}_3$  (50 mM, 2.25 mL) was added to it and shaken at 37°C for 1 h. Afterwards, a mixed solution of IAA (400 mM, 0.5 mL) and  $\text{NH}_4\text{HCO}_3$  (50 mM, 4.5 mL) was added to it under dark conditions and alkylated at 37°C for 1h. Finally, trypsin (1 mg  $\text{mL}^{-1}$ , 125  $\mu$ L) was added, and enzymatic degradation was carried out at 37°C for 16 hours in a dark environment.

### Enzymatic digestion of serum

Serum samples were collected from multiple healthy volunteers and

volunteers with preeclampsia (PE). 1 mg serum was dissolved in  $\text{NH}_4\text{HCO}_3$  (50 mM) and denatured at  $100^\circ\text{C}$  for 12 minutes. After natural cooling, DTT (200 mM) and  $\text{NH}_4\text{HCO}_3$  (50 mM) were added to it and shaken at  $37^\circ\text{C}$  for 1 h. Subsequently, a mixed solution of IAA (400 mM) and  $\text{NH}_4\text{HCO}_3$  (50 mM) were added to it in a dark environment and alkylated at  $37^\circ\text{C}$  for 1 h. Finally add trypsin ( $1 \text{ mg mL}^{-1}$ ) and shake overnight.

### **Enrichment of glycopeptides from PE serum**

1 mg of BCS was ultrasonically dispersed in 100  $\mu\text{L}$  of loading buffer (100 mM  $\text{NH}_4\text{HCO}_3$ ), 500  $\mu\text{g}$  of biological samples digests were added and the solution was shaken at  $37^\circ\text{C}$  for 2 hours. The supernatant was removed by centrifugation and washed with loading buffer (100 mM  $\text{NH}_4\text{HCO}_3$ ) several times. Then 10  $\mu\text{L}$  of eluting buffer (2% TFA dissolved in 50% ACN aqueous solution) was added and incubated at  $37^\circ\text{C}$  for 1 h and repeat it again. The eluate was collected, desalted and lyophilized for later use.

### **MALDI-TOF MS analysis**

All experiments were recorded by MALDI-TOF MS (Bruker auto flex max). The instrument was operated by an upgraded Nd:YAG laser at 355 nm and an acceleration voltage of TOF at 20 kV with a detection frequency of 1000 Hz. The detection range of the mass-to-charge ratio was 1000-5000 Da. 2,5-

Dihydroxybenzoic acid (DHB) ( $20 \text{ mg mL}^{-1}$ , dissolved in ACN:H<sub>2</sub>O = 30:70, v/v) was applied as the matrix.

### **Nano LC-MS/MS analysis**

Liquid phase A was a 0.1% formic acid aqueous solution, and B was a 0.1% formic acid acetonitrile solution (acetonitrile is 100%). Column Thermo Scientific analytical column ( $75 \mu\text{m} \times 25 \text{ cm}$ ,  $5 \mu\text{m}$ ,  $100 \text{ \AA}$ , C18) was equilibrated with 95% A liquid. The sample was loaded by the autosampler to the Thermo Scientific EASY trap column ( $100 \mu\text{m} \times 2 \text{ cm}$ ,  $5 \mu\text{m}$ ,  $100 \text{ \AA}$ , C18), and then separated by the chromatographic column. The relevant liquid gradient was as follows: from 0 min to 40 min, linear gradient of liquid B was from 5% to 28%; from 40 minutes to 42 minutes, the linear gradient of liquid B was from 28% to 90%; from 42 minutes to 60 minutes, the liquid B was maintained at 90%. The enzymatic hydrolysis products were desalted and separated by capillary high performance liquid chromatography, and then analyzed by mass spectrometry using Orbitrap Fusion Lumos mass spectrometer (Thermo Finnigan, San Jose, CA). Analysis time: 60min, detection method: positive ion, precursor ion scan range: 375-1800 m/z, primary mass spectrometry resolution: 120,000 at m/z 200, scan mode: Top-Speed, AGC target:  $4 \times 10^5$ , first-level Maximum IT: 50 ms, Number of scan ranges: 1, Dynamic exclusion: 40.0 s, Data Dependent Mode: Cycle Time, Time between Master Scan: 3s. The mass-to-charge ratios of peptides and peptide fragments were collected according to the following

method: the secondary spectrum scan (MS2 scan) was performed at the same time as each primary scan (Master scan), the scanning cycle was 3s, MS2 Activation Type: HCD, secondary mass spectrometry Resolution: 50,000 at m/z 200, Microscans: 1, Level 2 Maximum IT: 105 ms, AGC target: 1e5.

## **Data analysis**

The original data of mass spectrometry analysis was RAW file, and the built-in software Proteome Discoverer 2.4 (Thermo Scientific) was used for library identification and quantitative analysis. The uniprot database is used this time: uniprot\_human\_20210621\_202249.fasta. When searching the library, submitting the RAW file to SequestHT through Proteome Discoverer, selecting the established database, and then searching the database. The search parameters were as follows: monoisotopic mass, trypsin digestion, maximum 2 missing cut sites, peptides Charged number: 2+, 3+ and 4+, fixed modification to carbamidomethylation (C), dynamic modification to oxidation (M), Acethyl (protein N-term) and Deamidated [N]. The maximum error of the precursor ion was 10 ppm, and the maximum error of the fragment ion was 0.05 Da. Proteome Discoverer 2.4 performs Peptide high Confidence screening based on the peptide identification results and outputted the results.

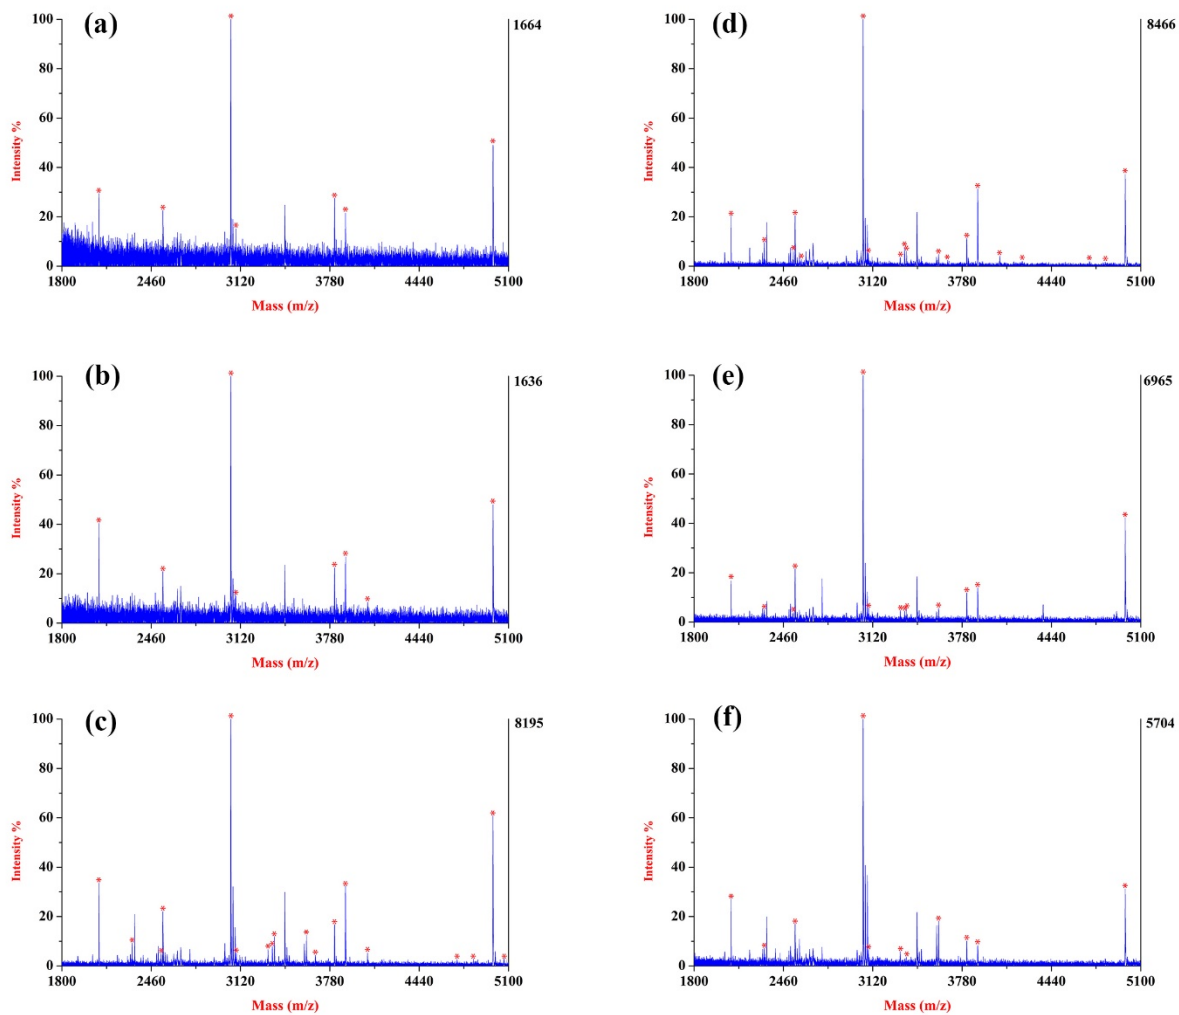

**Fig. S1.** The enrichment performance of BCS prepared at different mass ratios: (a)  $G_{10}B_1N_1$ , (b)  $G_{10}B_3N_1$ , (c)  $G_{10}B_{10}N_1$ , (d)  $G_{10}B_{10}N_1$ , (e)  $G_{10}B_{10}N_5$ , (f)  $G_{10}B_3N_{10}$ .

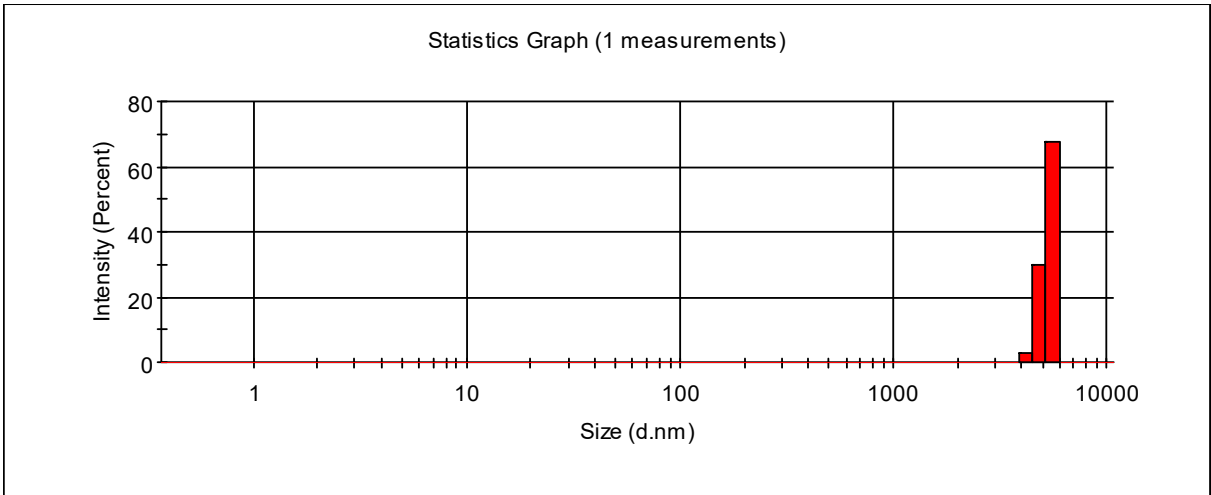

**Fig. S2.** DLS measurement showing size distribution of BCS.

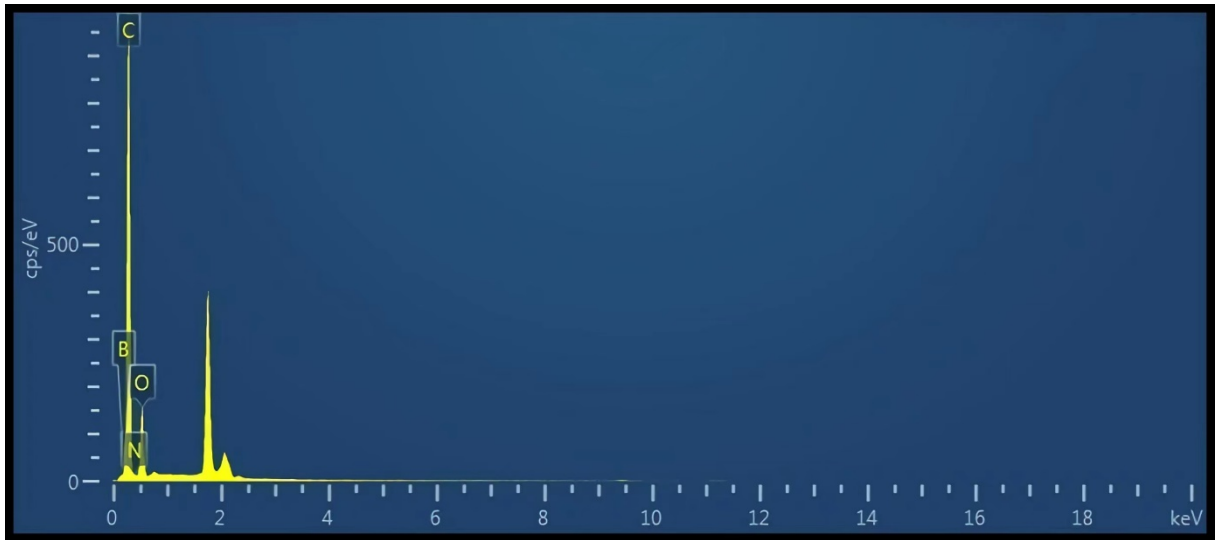

**Fig. S3.** The EDX spectrum of BCS.

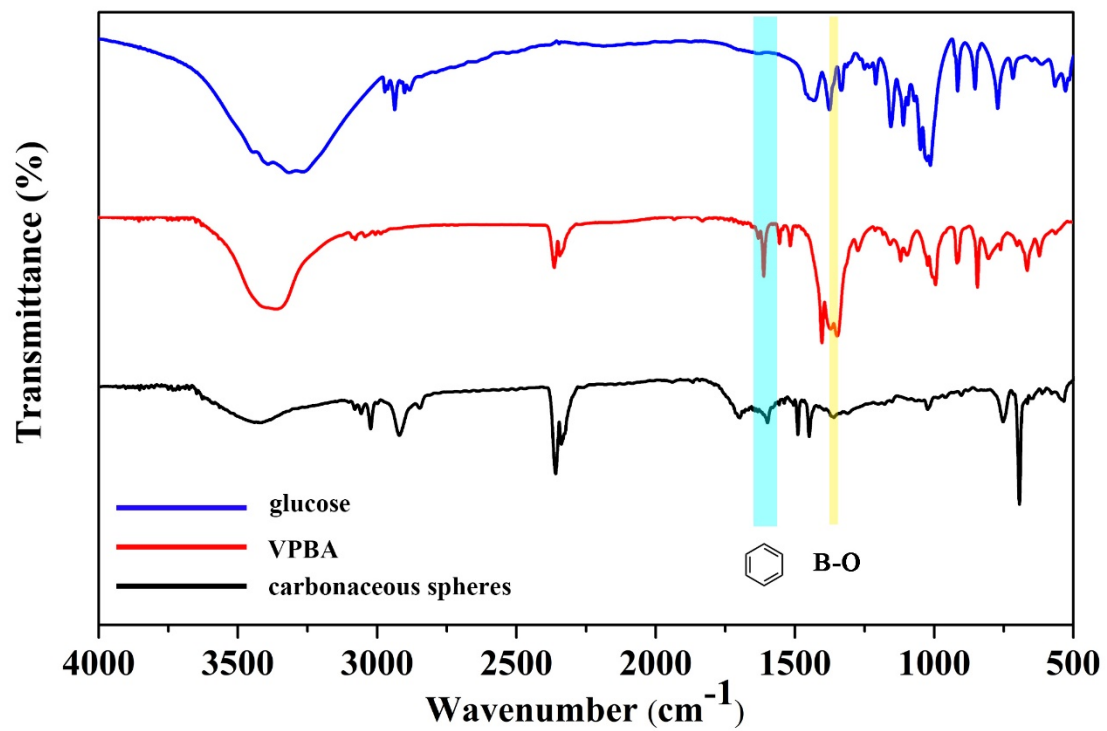

**Fig. S4.** The FT-IR spectra of BCS.



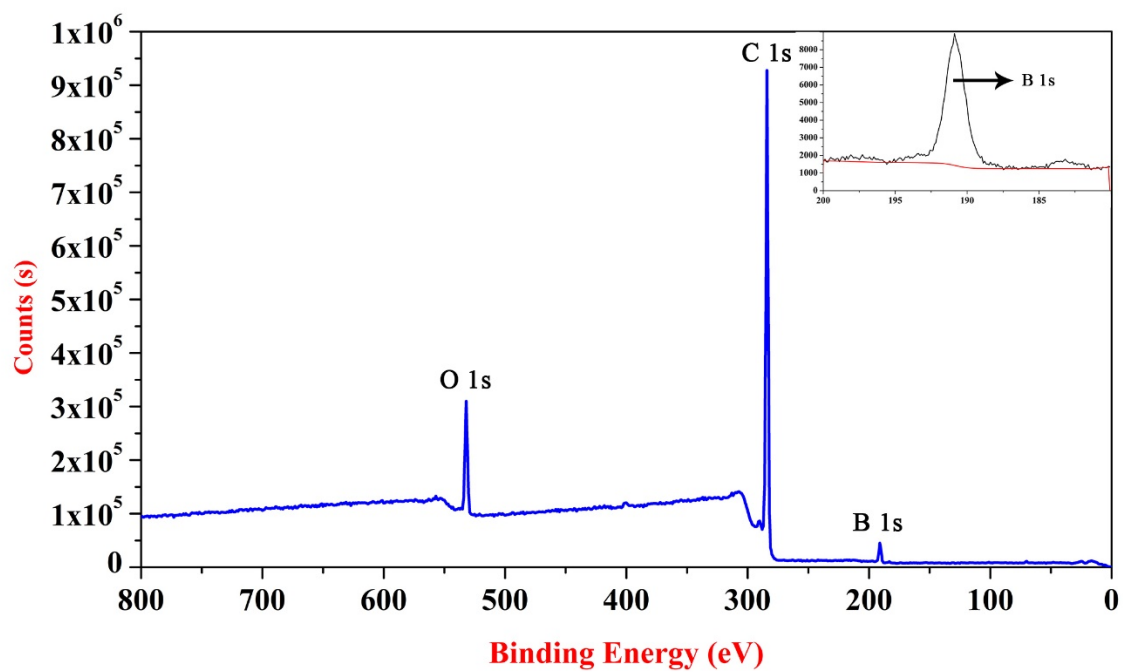

**Fig. S5.** XPS spectra of BCS nanocomposite. Inset: XPS spectra of elemental boron.

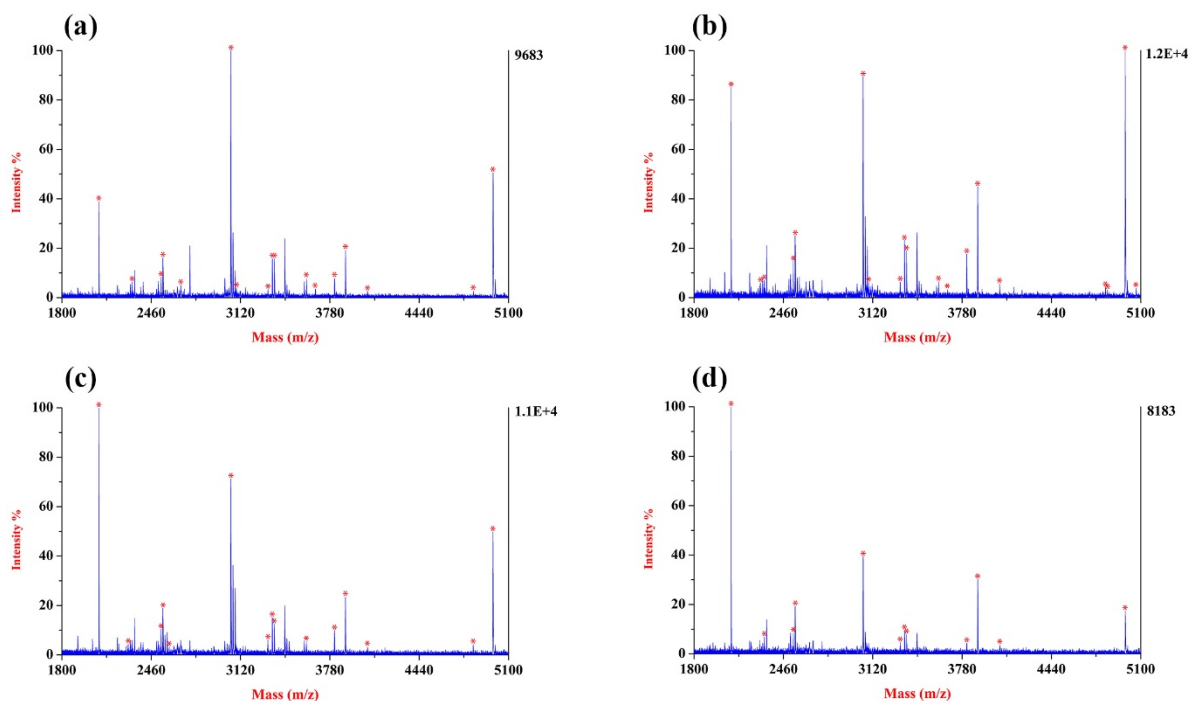

**Fig. S6.** MALDI-TOF MS spectra of HRP tryptic digest eluted with different eluting buffer by BCS: (a) for 1% TFA dissolved in 50% ACN aqueous solution, (b) for 2% TFA dissolved in 50% ACN aqueous solution, (c) for 3% TFA dissolved in 50% ACN aqueous solution, (d) 4% TFA dissolved in 50% ACN aqueous solution. Asterisk (\*) indicates peaks associated with glycopeptide.

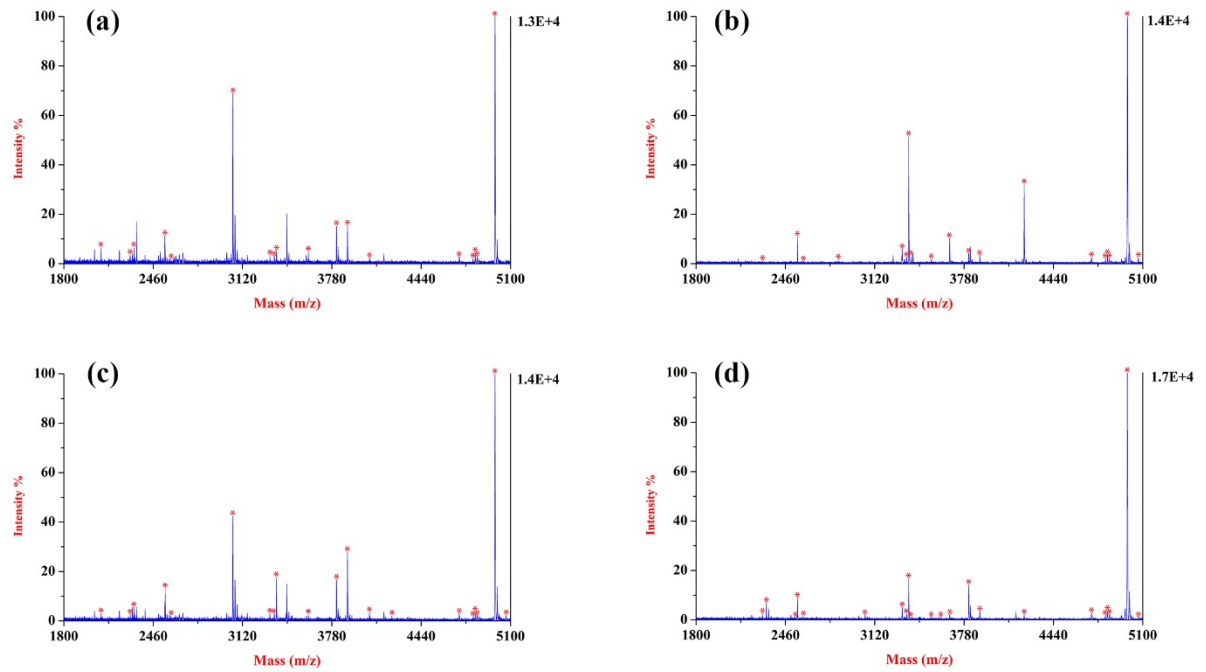

**Fig. S7.** MALDI-TOF MS spectra of HRP tryptic digest eluted with different loading buffer by BCS: (a) for 25 mM  $\text{NH}_4\text{HCO}_3$ , (b) for 50 mM  $\text{NH}_4\text{HCO}_3$ , (c) for 75 mM  $\text{NH}_4\text{HCO}_3$ , (d) 100 mM  $\text{NH}_4\text{HCO}_3$ . Asterisk (\*) indicates peaks associated with glycopeptide.

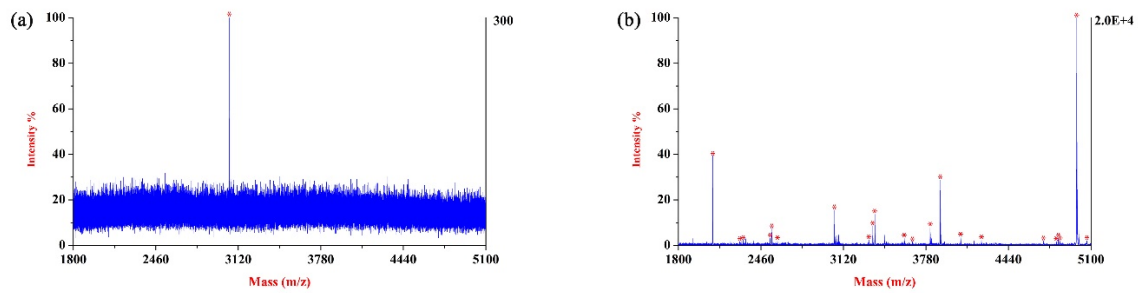

**Fig. S8.** MALDI-TOF MS spectra of HRP tryptic digest: (a) before the enrichment, (b) after the enrichment by BCS. Asterisk (\*) indicates peaks associated with glycopeptide.

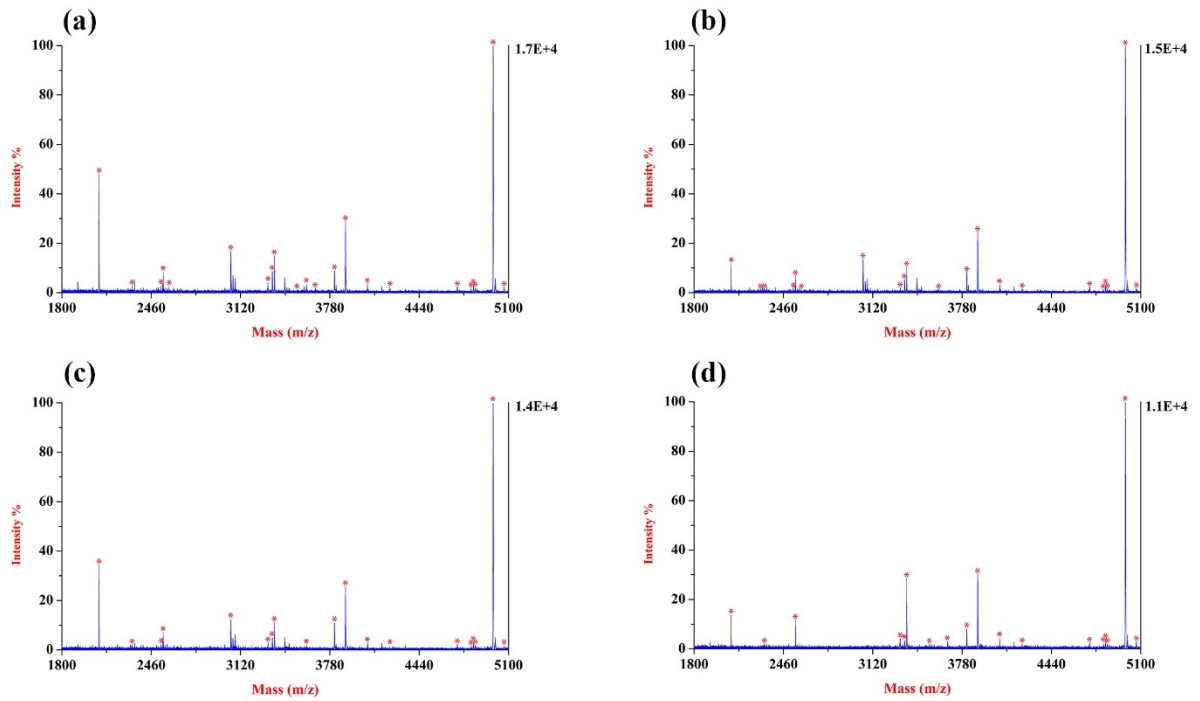

**Fig. S9.** MALDI-TOF MS spectra analysis of glycopeptides from HRP tryptic digest after enriched by BCS, (a) The third time, (b) The fifth time, (c) The seventh time, and (d) The tenth time. Asterisk (\*) indicates peaks associated with glycopeptide.

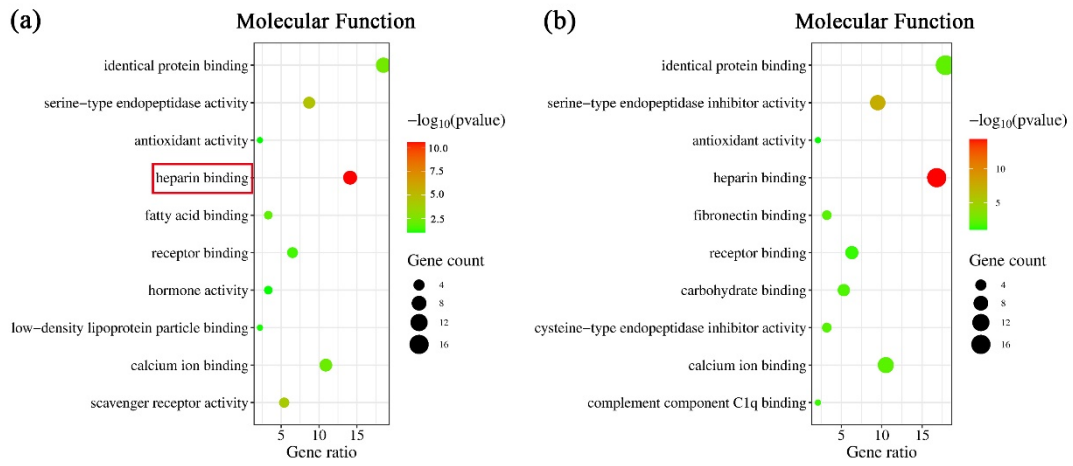

**Fig. S10.** The GO analysis of the molecular function for the identified glycoproteins from serum of (a) PE patients and (b) normal pregnancy controls.

**Table S1** Preparation of carbonaceous spheres G<sub>x</sub>B<sub>y</sub>N<sub>z</sub> at different mass ratio.

| Carbonaceous Spheres                            | Glucose | VPBA | Initiator |
|-------------------------------------------------|---------|------|-----------|
| G <sub>10</sub> B <sub>1</sub> N <sub>1</sub>   | 10      | 1    | 1         |
| G <sub>10</sub> B <sub>3</sub> N <sub>1</sub>   | 10      | 3    | 1         |
| G <sub>10</sub> B <sub>10</sub> N <sub>1</sub>  | 10      | 10   | 1         |
| G <sub>10</sub> B <sub>10</sub> N <sub>5</sub>  | 10      | 10   | 5         |
| G <sub>10</sub> B <sub>10</sub> N <sub>10</sub> | 10      | 10   | 10        |

**Table S2.** Elemental compositions and relative contents of BCS obtained from EDX analysis.

| element | Wt%   | At%   |
|---------|-------|-------|
| C       | 75.27 | 78.45 |
| O       | 18.87 | 14.77 |
| N       | 0.00  | 0.00  |
| B       | 5.86  | 6.78  |



**Table S3.** Detailed information of the observed glycopeptides derived from HRP tryptic digest. “N#”: N-glycosylation site.

|    |      |                                         |                                     |
|----|------|-----------------------------------------|-------------------------------------|
| 1  | 2073 | Man3GlcNAc2                             | DSFRNVGLN#R                         |
| 2  | 2290 | XylMan2GlcNAc2                          | SILLDN#TTSFR                        |
| 3  | 2320 | Man2GlcNAc2                             | MGN#ITPLTGTQGQIR                    |
| 4  | 2533 | FucGlcNAc                               | SFAN#STQTFNFAFVEAMDR                |
| 5  | 2544 | XylMan3FucGlcNAc2                       | SSPN#ATDTIPLVR                      |
| 6  | 2591 | XylMan3FucGlcNAc2                       | PTLN#TTYLQTLR                       |
| 7  | 3048 | XylMan2GlcNAc2                          | SFAN#STQTFNFAFVEAMDR                |
| 8  | 3323 | XylMan3FucGlcNAc2                       | QLTPTFYDNSCPN#VSNIVR                |
| 9  | 3354 | XylMan3FucGlcNAc2                       | SFAN#STQTFNFAFVEAMDR                |
| 10 | 3369 | XylMan3FucGlcNAc2                       | SFAN#STQTFNFAFVEAM*DR               |
| 11 | 3606 | XylMan3FucGlcNAc2                       | NQCRGLCPLNGN#LSALVDFDLR             |
| 12 | 3672 | XylMan3FucGlcNAc2                       | GLIQSDQELFSSPN#ATDTIPLVR            |
| 13 | 3812 | XylMan3FucGlcNAc2                       | LHFHDCFVNGCDASILLDN#TTSFR           |
| 14 | 3895 | XylMan3FucGlcNAc2                       | LHFHDCFVNGCDASILLDN#TTSFR           |
| 15 | 4057 | XylMan3GlcNAc2                          | QLTPTFYDNSC(AAVESACPR)PN#VSNIVR-H2O |
| 16 | 4223 | XylMan3FucGlcNAc2                       | QLTPTFYDNSC(AAVESACPR)PN#VSNIVR     |
| 17 | 4720 | Man3FucGlcNAc2,<br>Man3FucGlcNAc2       | LYN#FSNTGLPDPTLN#TTYLQTLR           |
| 18 | 4823 | XylMan2FucGlcNAc2,<br>XylMan2GlcNAc2    | LYN#FSNTGLPDPTLN#TTYLQTLR           |
| 19 | 4838 | XylMan3FucGlcNAc2,<br>XylMan3GlcNAc2    | LYN#FSNTGLPDPTLN#TTYLQTLR           |
| 20 | 4854 | Man3FucGlcNAc2,<br>XylMan3FucGlcNAc2    | LYN#FSNTGLPDPTLN#TTYLQTLR           |
| 21 | 4985 | XylMan3FucGlcNAc2,<br>XylMan3FucGlcNAc2 | LYN#FSNTGLPDPTLN#TTYLQTLR           |
| 22 | 5068 | Xyl Man3GlcNAc2                         | QLTPTFYDNSC(AAVESACPR)PN#VSNIVR     |

**Table S4.** Details of enriched glycopeptides derived from serum of the PE patients and healthy pregnant women by BCS. **N:** N-glycosylation site.

| No.                                                        | Sequence                                                  | Protein           | Modifications                                      |
|------------------------------------------------------------|-----------------------------------------------------------|-------------------|----------------------------------------------------|
| Glycopeptides detected both in normal and PE patient serum |                                                           |                   |                                                    |
| 1                                                          | [K].F <b>N</b> LTETSEAEIHQSFQHLLR.[T]                     | A0A024R6P0        | 1xDeamidated [N2]                                  |
| 2                                                          | [K].ADTHDEILEGLNF <b>N</b> LTEIPEAQIHEGFQELLR.[T]         | P01009            | 1xDeamidated [N14]                                 |
| 3                                                          | [K].LGSFEGLV <b>N</b> LTFIHLQHNR.[L]                      | P00738            | 1xDeamidated [N9]                                  |
| 4                                                          | [R].YPHKPEI <b>N</b> STTHPGADLQENFCR.[N]                  | G3V387            | 1xCarbamidomethyl [C22];<br>1xDeamidated [N8]      |
| 5                                                          | [K]. <b>N</b> NATVHEQVGGPSLTSDLQAQSK.[G]                  | D9ZGG2            | 1xDeamidated [N]                                   |
| 6                                                          | [K].AF <b>N</b> VTDLQWLILDHNLLENSK.[I]                    | Q59HB3;<br>C0JYY2 | 1xDeamidated [N4]                                  |
| 7                                                          | [K].ELHHLQE <b>N</b> VSNAFLDKGEFYIGSK.[Y]                 | P20851            | 2xDeamidated [N9; N12]                             |
| 8                                                          | [K].ADTHDEILEGLNF <b>N</b> LTEIPEAQIH.[-]                 | P02765            | 2xDeamidated [N1; N2]                              |
| 9                                                          | [K].DFHSEYIVSAS <b>N</b> FTSQLSSQVEQFLHR.[N]              | P02787            | 1xDeamidated [N12]                                 |
| 10                                                         | [R].LGHCPDPVLVNGEFSSSGPV <b>N</b> VSDK.[I]                | I3L145            | 1xCarbamidomethyl [C4];<br>2xDeamidated [N11; N21] |
| 11                                                         | [-<br>K].MVSHH <b>N</b> LTGATLINEQWLLTAK.[N]              | P01023            | 1xDeamidated [N6]                                  |
| 12                                                         | [R].ADGTVNQIEGEATPV <b>N</b> LTEPAK.[L]                   | P04003            | 1xDeamidated [N16]                                 |
| 13                                                         | [K].VTVQSLLTVETLEH <b>N</b> QTYECR.[A]                    | P00734            | 1xCarbamidomethyl [C20];<br>1xDeamidated [N15]     |
| 14                                                         | [R].SHEIWITHSCPQSPG <b>N</b> GTDASH.[-]                   | A5PL27            | 1xCarbamidomethyl [C9];<br>1xDeamidated [N15]      |
| 15                                                         | [K].LPTQ <b>N</b> ITFQTESSVAEQEAEFQSPK.[Y]                | A0A024R462        | 1xDeamidated [N5]                                  |
| 16                                                         | [R].LSLHRPALEDLLLGSE <b>N</b> LTC<br>TLTGLR.[D]           | A0A024R035        | 1xCarbamidomethyl [C21];<br>1xDeamidated [N18]     |
| 17                                                         | [K].LDAPTNLQFV <b>N</b> ETDSTVLVR.[W]                     | P00739;<br>P00738 | 1xDeamidated [N11]                                 |
| 18                                                         | [K].EGYS <b>N</b> ISYIVVNHQGISSR.[L]                      | A0A384N669        | 1xCarbamidomethyl [C4];<br>1xDeamidated [N21]      |
| 19                                                         | [K].DIVEYY <b>N</b> DS <b>N</b> GS <del>H</del> VLQGR.[F] | P49908            | 2xDeamidated [N7; N10]                             |
| 20                                                         | [R].KVCQDCPLLAPL <b>N</b> DTR.[V]                         | B2R950            | 2xCarbamidomethyl [C3;<br>C6]; 1xDeamidated [N13]  |
| 21                                                         | [K].VS <b>N</b> QTLSLFFTVLQDVPVR.[D]                      | P02790            | 1xDeamidated [N3]                                  |
| 22                                                         | [R]. <b>N</b> GTGHG <b>N</b> STHHGPEYMR.[C]               | B2RMS9            | 2xDeamidated [N1; N7]                              |
| 23                                                         | [R].LSHNELADSGIPGNSF <b>N</b> VSSLV<br>ELDLSYNK.[L]       | P11464            | 1xDeamidated [N17]                                 |

|    |                                          |            |                                                      |
|----|------------------------------------------|------------|------------------------------------------------------|
| 24 | [R].SQILEGLGFNLTESESDVHR.[G]             | D9IWP9     | 1xDeamidated [N10]                                   |
| 25 | [K].EHEGAIYPDNTTDFQR.[A]                 | B7Z539     | 3xCarbamidomethyl [C6; C10; C22]; 1xDeamidated [N11] |
| 26 | [K].IGDENCDPECNHTLTGHDGGDCR.[H]          | A8K9A9     | 2xCarbamidomethyl [C13; C18]; 1xDeamidated [N9]      |
| 27 | [R].AVNITSENLI DDVVSLIR.[G]              | A0A140VK00 | 2xCarbamidomethyl [C11; C16]; 1xDeamidated [N7]      |
| 28 | [R].QQQHLFGSNVTDCSGNFCLFR.[S]            | P01024     | 2xDeamidated [N14; N17]                              |
| 29 | [K].ENLTAPGSDSAVFFEQGTTR.[I]             | A0A8Q3WKN4 | 2xDeamidated [N12; N14]                              |
| 30 | [K].LSDLSINSTECLHVVHCR.[G]               | P0DOX2     | 1xCarbamidomethyl [C13]; 1xDeamidated [N4]           |
| 31 | [K].VHNGSEILFSYFQDLVITLPFLR.[K]          | A0A384NKS6 | 2xCarbamidomethyl [C11; C28]; 1xDeamidated [N15]     |
| 32 | [K].VVLHPNYSQVDIGLIK.[L]                 | P01833     | 1xDeamidated [N13]                                   |
| 33 | [K].HYTNSSQDVTVPCR.[V]                   | D3DNU8     | 1xCarbamidomethyl [C20]; 1xDeamidated [N6]           |
| 34 | [R].FEVDSPVYNATWSASLK.[N]                | B2R9F2     | 1xDeamidated [N15]                                   |
| 35 | [R].ADGTVNQIEGEATPVNLTEPAKLEVK.[F]       | B1AKG0     | 1xCarbamidomethyl [C18]; 1xDeamidated [N10]          |
| 36 | [R].FSLLGHASISCTVENETIGVWRPSPPTCEK.[I]   | C0JYY2     | 1xCarbamidomethyl [C23]; 2xDeamidated [N4; N11]      |
| 37 | [K].LGTSLSSGHVLMNGTLK.[Q]                | P01871     | 2xCarbamidomethyl [C2; C5]; 1xDeamidated [N12]       |
| 38 | [K].SLGNVNFTVSAEALESQELCGTEVPSVPEHGR.[K] | P55058     | 2xCarbamidomethyl [C3; C15]; 1xDeamidated [N14]      |
| 39 | [K].SVQEIQATFFYFTP NKTEDTIFLR.[E]        | Q9Y5Y7     | 1xCarbamidomethyl [C15]; 1xDeamidated [N6]           |
| 40 | [K].VASVININPNTTHSTGSCR.[S]              | Q08380     | 1xCarbamidomethyl [C14]; 1xDeamidated [N7]           |
| 41 | [K].THTNISESHPNATFSAVGEASICEDDWSNGER.[F] | B4DZ36     | 1xCarbamidomethyl [C19]; 1xDeamidated [N16]          |
| 42 | [K].VCQDCPLLAPLNDTR.[V]                  | B2R8I2     | 1xCarbamidomethyl [C4]; 1xDeamidated [N7]            |
| 43 | [K].LQAPLNYTEFQKPICLPSK.[G]              | C9JF17     | 2xDeamidated [N6; N13]                               |
| 44 | [K].ALPQPQNVTSLLGCTH.[-]                 | B2MUD5     | 1xCarbamidomethyl [C14]; 1xDeamidated [N5]           |
| 45 | [K].QSVPAHFVALNGSK.[L]                   | A0A5C2FVK9 | 1xDeamidated [N18]                                   |
| 46 | [K].VGQLQLSHNLSLVILVPQNLK.[H]            | P29622     | 2xDeamidated [N3; N11]                               |
| 47 | [K].DGAVESISVPDMVDKNLTCPEEEDTVK.[V]      | P05156     | 1xCarbamidomethyl [C20]; 2xDeamidated [N4; N6]       |
| 48 | [R].QDQCIYNTTYLNVQR.[E]                  | P07996     | 1xCarbamidomethyl [C10]; 2xDeamidated [N6; N]        |
| 49 | [R].ETAYSNASLLIQNVTR.[E]                 | P02763;    | 2xDeamidated [N5; N9]                                |

|    |                                     |                   |                                                       |
|----|-------------------------------------|-------------------|-------------------------------------------------------|
|    |                                     | P19652            |                                                       |
| 50 | [R].FNSSYLQGTNQITGR.[Y]             | P80108            | 1xDeamidated [N8]                                     |
| 51 | [R].SPYYNVSDEISFHCYDGYTLR.<br>[G]   | H0Y512            | 2xDeamidated [N5; N6]                                 |
| 52 | [K].ALGISPFHEHAEVVFTANDSG<br>PR.[R] | A0A8S0MA<br>G0    | 2xDeamidated [N2; N10]                                |
| 53 | [K].SENYTYIWWLNGQSLPVSPR.<br>[V]    | P19823            | 1xCarbamidomethyl [C6];<br>1xDeamidated [N3]          |
| 54 | [R].LQNNENNISCVER.[G]               | A0A5C2GH<br>F1    | 1xCarbamidomethyl [C12];<br>1xDeamidated [N13]        |
| 55 | [K].NLFLNHSEENATAK.[D]              | P27169            | 1xCarbamidomethyl [C9];<br>1xDeamidated [N6]          |
| 56 | [R].VYKPSAGNNSLYR.[D]               | A0A140VKE<br>5    | 3xCarbamidomethyl [C2; C3;<br>C11]; 1xDeamidated [N1] |
| 57 | [K].ELHHLQEQNVSN AFLDK.[G]          | P19652            | 2xDeamidated [N3; N9]                                 |
| 58 | [K].VVNSTTGPGHEHLR.[N]              | P43652            | 1xCarbamidomethyl [C1];<br>1xDeamidated [N8]          |
| 59 | [R].ALGFENATQALGR.[A]               | Q6N093            | 1xCarbamidomethyl [C1];<br>1xDeamidated [N5]          |
| 60 | [K].SLTFNETYQDISELVYGAK.[L]         | Q13201            | 1xCarbamidomethyl [C4];<br>1xDeamidated [N1]          |
| 61 | [K].YLG NATAIFFLPDEGK.[L]           | A0A8Q3WK<br>W7    | 2xCarbamidomethyl [C4;<br>C16]; 1xDeamidated [N14]    |
| 62 | [K].MLNTSSLLEQLNEQFNWVSR.<br>[L]    | Q15228            | 2xDeamidated [N8; N9]                                 |
| 63 | [K].LNAENNATFYFK.[I]                | Q6UY50            | 1xCarbamidomethyl [C1];<br>2xDeamidated [N10; N12]    |
| 64 | [K].VTQVYAENGTVLQGSTVASV<br>YK.[G]  | F2Z3N2;<br>B4E1Z4 | 1xCarbamidomethyl [C8];<br>1xDeamidated [N1]          |
| 65 | [K].GLNLTEDTYKPR.[I]                | D6RHJ6            | 1xCarbamidomethyl [C9];<br>1xDeamidated [N5]          |
| 66 | [R].LSLLEEPGN GTFTVILNQLTSR.<br>[D] | P43251            | 1xCarbamidomethyl [C1];<br>2xDeamidated [N5; N11]     |
| 67 | [K].VSNVSCQASVSR.[M]                | P04275            | 1xDeamidated [N1]                                     |
| 68 | [K].AGLQAFFQVQECNK.[S]              | A0A286YFJ<br>8    | 1xDeamidated [N7]                                     |
| 69 | [K].MDGASN VTCINSR.[W]              | F8WF14            | 1xCarbamidomethyl [C4];<br>2xDeamidated [N7; N12]     |
| 70 | [R].NCCNTENPPGCYR.[Y]               | P13727            | 1xCarbamidomethyl [C10];<br>1xDeamidated [N3]         |
| 71 | [K].LQNLTLPTNASIK.[F]               | Q8J009            | 1xCarbamidomethyl [C1];<br>1xDeamidated [N12]         |
| 72 | [R].VVTVAALGTNISIHKDEIGK.[V<br>]    | O95497            | 1xCarbamidomethyl [C8];<br>1xDeamidated [N7]          |
| 73 | [R].CATPHGDNASLEATFVK.[R-]          | Q16557            | 2xDeamidated [N7; N9]                                 |
| 74 | [R].CRPINATLAVEK.[E]                | V9HWI6            | 2xDeamidated [N3; N4]                                 |
| 75 | [R].NHSCSEGQISIFR.[Y]               | K7ER74            | 1xCarbamidomethyl [C7];<br>1xDeamidated [N4]          |
| 76 | [K].QEVCEEFSQQLNSNGCITQQV           | P19801            | 1xCarbamidomethyl [C3];                               |

|    |                            |                              |                                                            |
|----|----------------------------|------------------------------|------------------------------------------------------------|
|    | HTK.[M]                    |                              | 1xDeamidated [N8]                                          |
| 77 | [R].LANLTQGEDQYYLR.[V]     | Q92954                       | 1xCarbamidomethyl [C7];<br>2xDeamidated [N3; N4]           |
| 78 | [K].YKNNSDISSTR.[G]        | P22792                       | 1xCarbamidomethyl [C3];<br>2xDeamidated [N7; N8]           |
| 79 | [R].FSDGLESNSSTQFEVK.[K]   | P13473                       | 3xDeamidated [N1; N5; N9]                                  |
| 80 | [K].CGLVPVLAENYK.[S]       | H0YNF7                       | 1xCarbamidomethyl [C3];<br>1xDeamidated [N1]               |
| 81 | [R].QNQCFYNSSYLVNQR.[E]    | A6XND1                       | 1xCarbamidomethyl [C6];<br>1xDeamidated [N1]               |
| 82 | [R].ANLSSQALR.[M]          | A0A384MD<br>Q7; P01009       | 1xCarbamidomethyl [C9];<br>2xDeamidated [N6; N11]          |
| 83 | [R].NETGPYQCEIQDR.[Y]      | A0A087WT5<br>9               | 1xCarbamidomethyl [C3];<br>1xDeamidated [N5]               |
| 84 | [R].AQLLQGLGFNLTER.[S]     | B4E1B2;<br>P02787            | 2xDeamidated [N6; N9]                                      |
| 85 | [R].ISENETTCYMGK.[W]       | Q5UGI6                       | 1xCarbamidomethyl [C4];<br>1xDeamidated [N5]               |
| 86 | [R].CIQANYSLMENGK.[I]      | X6RLJ0                       | 2xCarbamidomethyl [C7;<br>C21]; 2xDeamidated [N16;<br>N26] |
| 87 | [K].NGSGAVFPVAGADVQTLR.[E] | A0A024R84<br>2               | 2xDeamidated [N6; N15]                                     |
| 88 | [R].NLTTSLTESVDR.[N]       | Q16557;<br>P11464;<br>Q8WYY6 | 1xCarbamidomethyl [C6];<br>1xDeamidated [N5]               |
| 89 | [R].IYSGILNLSDITK.[D]      | P01008                       | 2xCarbamidomethyl [C7;<br>C19]; 1xDeamidated [N5]          |
| 90 | [K].LGNWSAMPSCK.[AE]       | E9PEK4                       | 1xCarbamidomethyl [C9];<br>1xDeamidated [N16]              |
| 91 | [R].SWPAVGNCSALR.[W]       | B2RAK1                       | 3xCarbamidomethyl [C2;<br>C27; C42]; 1xDeamidated<br>[N17] |
| 92 | [K].LENITNPWSPR.[H]        | Q8IZZ5                       | 2xDeamidated [N]                                           |
| 93 | [K].IDSTGNVTNELR.[V]       | F5GXS0;<br>A0A140TA3<br>2    | 2xDeamidated [N5; N]                                       |
| 94 | [K].SPDVINGSPISQK.[I]      | P11465;<br>P11464            | 2xCarbamidomethyl [C13;<br>C18]; 2xDeamidated [N9;<br>N16] |
| 95 | [R].LDVDQALNR.[S]          | A0A286YEY<br>5               | 3xDeamidated [N7; N10;<br>N11]                             |
| 96 | [R].VELEDFNGNR.[T]         | Q9Y6R7                       | 1xCarbamidomethyl [C12];<br>1xDeamidated [N7]              |
| 97 | [K].NLTCPEEEDTVK.[V]       | A0A024R84<br>2; Q13219       | 1xDeamidated [N24]                                         |
| 98 | [R].LIINYASNR.[A]          | P02763                       | 1xCarbamidomethyl [C1];<br>1xDeamidated [N]                |
| 99 | [K].IGEADFNR.[S]           | Q5SQ11                       | 1xCarbamidomethyl [C21];                                   |

|     |                         |                                         |                                                                    |
|-----|-------------------------|-----------------------------------------|--------------------------------------------------------------------|
|     |                         |                                         | 1xDeamidated [N9]                                                  |
| 100 | [K].AAIPSALDTNSSK.[S]   | A0A0F7RQP8                              | 1xDeamidated [N12];<br>1xOxidation [M10]                           |
| 101 | [K].HANWTLTPLK.[S]      | P23142                                  | 1xCarbamidomethyl [C10];<br>1xDeamidated [N7]                      |
| 102 | [K].NNSDISSTR.[G]       | A0A024R962; A8K5T0                      | 2xDeamidated [N3; N7]                                              |
| 103 | [K].EVFVHPNYSK.[S]      | P02768                                  | 1xCarbamidomethyl [C11];<br>1xDeamidated [N7]                      |
| 104 | [R].NETGPYQCEIR.[D]     | P05160                                  | 1xCarbamidomethyl [C9];<br>1xDeamidated [N4]                       |
| 105 | [K].EDALNETR.[E]        | A0A024R962                              | 1xCarbamidomethyl [C10];<br>1xDeamidated [N9]                      |
| 106 | [R].EEQYNSTFR.[V]       | A0A8V8TQ26                              | 3xDeamidated [N3; N6; N8]                                          |
| 107 | [R].EEQFNSTFR.[V]       | Q00887;<br>P11464;<br>Q8WYY6;<br>M0R276 | 1xCarbamidomethyl [C2];<br>1xDeamidated [N4]                       |
| 108 | [R].FNDTEVLQR.[L]       | A0A4W9A917                              | 1xCarbamidomethyl [C9];<br>1xDeamidated [N7]                       |
| 109 | [K].GAFISNFSMTVDGK.[T]  | Q8WYY6                                  | 2xCarbamidomethyl [C4;<br>C7]; 1xDeamidated [N1]                   |
| 110 | [R].EEQFNSTYR.[V]       | C9JSN9                                  | 3xDeamidated [N10; N11;<br>N14]                                    |
| 111 | [K].DVLNFTCEPK.[S]      | Q4LDE5                                  | 2xCarbamidomethyl [C6;<br>C24]; 1xDeamidated [N2]                  |
| 112 | [R].GGSSGWSGGLAQR.[S]   | P05546                                  | 1xCarbamidomethyl [C10];<br>2xDeamidated [N6; N7]                  |
| 113 | [R].FGCEIENR.[S]        | Q15238;<br>Q16557;<br>P11464;<br>Q96QL5 | 1xCarbamidomethyl [C10];<br>1xDeamidated [N3];<br>1xOxidation [M7] |
| 114 | [R].ILILPNVTR.[N]       | P02766                                  |                                                                    |
| 115 | [R].ENISDPTSPLR.[T]     | Q13219                                  |                                                                    |
| 116 | [K].FLNNGTCTAEGK.[F]    | Q00887                                  |                                                                    |
| 117 | [R].DIENFNSTQK.[F]      | B4E1Z4                                  |                                                                    |
| 118 | [R].AGPNGTFLFVADAYK.[G] | P03951                                  |                                                                    |
| 119 | [K].FVEGSHNSTVSLTTK.[N] | P02750;<br>Q68CK4                       |                                                                    |
| 120 | [K].ANQQLNFTEAK.[E]     | P80188                                  |                                                                    |
| 121 | [K].ELLETVVNR.[T]       | Q96QL5                                  |                                                                    |
| 122 | [R].NECFLQHK.[D]        | Q15238                                  |                                                                    |
| 123 | [R].DTFVNASR.[T]        | G3V0E5                                  |                                                                    |
| 124 | [K].NGTAVCATNR.[R]      | Q7Z351                                  |                                                                    |
| 125 | [K].NFTENDLLVR.[I]      |                                         |                                                                    |
| 126 | [K].YDFNSSMLYSTAK.[G]   |                                         |                                                                    |
| 127 | [R].EEQYNSTYR.[V]       |                                         |                                                                    |

|     |                                                                                                                  |  |  |
|-----|------------------------------------------------------------------------------------------------------------------|--|--|
| 128 | [K].DFYVDEN <b>T</b> TVR.[V]                                                                                     |  |  |
| 129 | [R].GL <b>N</b> VTLSS <b>T</b> GR.[N]                                                                            |  |  |
| 130 | [K].WSDI <b>W</b> N <b>A</b> TK.[Y]                                                                              |  |  |
| 131 | [R].GLCV <b>N</b> ASAVSR.[L]                                                                                     |  |  |
| 132 | [K].LGAC <b>N</b> DTLQQLMEVFKFDTIS<br>EK.[T]                                                                     |  |  |
| 133 | [R].DTAVFECLPQH <b>A</b> MFG <b>N</b> DTITC<br>TTHG <b>N</b> WTK.[L]                                             |  |  |
| 134 | [R].VIDF <b>N</b> CTTSSVSSAL <b>A</b> NTK.[D]                                                                    |  |  |
| 135 | [K].DVLLL <b>V</b> H <b>N</b> L <b>P</b> Q <b>N</b> L <b>T</b> GYIWYK.<br>[G]                                    |  |  |
| 136 | [R].VLS <b>N</b> NSDANLELINTW <b>V</b> AK.[N<br>]                                                                |  |  |
| 137 | [K].SR <b>P</b> AN <b>H</b> CVYFYGDEISFSCHE<br>TSR.[F]                                                           |  |  |
| 138 | [K].QVFPGLNYCTSGAYS <b>N</b> AS <b>S</b> TD<br>SASY <b>Y</b> PL <b>T</b> GDTR.[L]                                |  |  |
| 139 | [K].TDCPELAVENAYL <b>N</b> CS <b>S</b> SDR.[<br>Y]                                                               |  |  |
| 140 | [R].GIASVLQEL <b>N</b> V <b>T</b> V <b>T</b> SLCR.[R]                                                            |  |  |
| 141 | [K].DCGVYTPQGFLDQWAS <b>N</b> AS <b>V</b><br>SHQDQ <b>Q</b> CPGW <b>V</b> IIGQ <b>P</b> AASQ <b>V</b> CR.<br>[T] |  |  |
| 142 | [K].AALAAFNAQ <b>N</b> GS <b>N</b> FQLE <b>E</b> IS<br>R.[A]                                                     |  |  |
| 143 | [K]. <b>N</b> TT <b>C</b> QDLQIEV <b>T</b> VK.[G]                                                                |  |  |
| 144 | [K].SE <b>N</b> YTYIW <b>W</b> L <b>N</b> GQSL <b>P</b> VSPGV<br>K.[R]                                           |  |  |
| 145 | [K].LYLGS <b>N</b> L <b>T</b> ALHPALFQ <b>N</b> LSK.<br>[L]                                                      |  |  |
| 146 | [R].GLTFQ <b>Q</b> NASSMC <b>V</b> PDQDTAIR<br>.[V]                                                              |  |  |
| 147 | [R].NPPMGG <b>N</b> VVIFDTVIT <b>N</b> QEEP<br>YQ <b>N</b> HSGR.[F]                                              |  |  |
| 148 | [K].STGKPTLY <b>N</b> VSLVMSDTAG <b>T</b> C<br>Y.[-]                                                             |  |  |
| 149 | [K].LETT <b>V</b> <b>N</b> Y <b>T</b> DSQR <b>P</b> ICL <b>P</b> SK.[G]                                          |  |  |
| 150 | [K].YT <b>G</b> <b>N</b> ASALFIL <b>P</b> DQDK.[M]                                                               |  |  |
| 151 | [R].FSGSGSGTDF <b>N</b> L <b>T</b> ISR.[L]                                                                       |  |  |
| 152 | [K].TVLTPAT <b>N</b> HMG <b>N</b> V <b>T</b> FTIPANR.<br>[E]                                                     |  |  |
| 153 | [K].Q <b>N</b> NGAF <b>N</b> ETLFR.[N]                                                                           |  |  |
| 154 | [K].FL <b>N</b> DTMAV <b>Y</b> EAK.[L]                                                                           |  |  |
| 155 | [K].F <b>N</b> PGAESV <b>V</b> LS <b>N</b> STLK.[F]                                                              |  |  |
| 156 | [K].LT <b>G</b> VAG <b>N</b> Y <b>T</b> VC <b>Q</b> K.[D]                                                        |  |  |
| 157 | [R].WFSAG <b>L</b> AS <b>N</b> SS <b>W</b> LR.[E]                                                                |  |  |
| 158 | [K].E <b>W</b> D <b>N</b> TTTECR.[L]                                                                             |  |  |
| 159 | [K]. <b>N</b> LSM <b>P</b> LL <b>P</b> AD <b>F</b> HK.[E]                                                        |  |  |

|                                             |                                             |                                         |                                                    |
|---------------------------------------------|---------------------------------------------|-----------------------------------------|----------------------------------------------------|
| 160                                         | [R].NETGPYECEIR.[D]                         |                                         |                                                    |
| 161                                         | [K].NGSLFAFR.[G]                            |                                         |                                                    |
| 162                                         | [K].TMFPNLTDVR.[E]                          |                                         |                                                    |
| 163                                         | [K].YNSQNSNNQFVLYR.[I]                      |                                         |                                                    |
| 164                                         | [R].ITYSIVQTNCSK.[E]                        |                                         |                                                    |
| 165                                         | [K].ISNFTNKNMK.[E]                          |                                         |                                                    |
| 166                                         | [K].DAVITGNFTFR.[N]                         |                                         |                                                    |
| 167                                         | [K].LCDNLSTK.[N]                            |                                         |                                                    |
| 168                                         | [R].WEYCNLTR.[C]                            |                                         |                                                    |
| 169                                         | [R].HGIQYFNNTQHSSLFTLNEV<br>K.[R]           |                                         |                                                    |
| 170                                         | [K].YLGNATAIFFLPDEGKLQHLE<br>NELTHDIITK.[F] |                                         |                                                    |
| 171                                         | [R].NHSCEPCQTLAVR.[S]                       |                                         |                                                    |
| 172                                         | [R].VNQNLVYESGSLNFSK.[L]                    |                                         |                                                    |
| 173                                         | [K].VNITVCGEYTYGKPVPLATV<br>SLCR.[K]        |                                         |                                                    |
| 174                                         | [K].THLSEVQAFFENQSEATFR.[L]                 |                                         |                                                    |
| 175                                         | [K].LPPGLLANFTLLR.[T]                       |                                         |                                                    |
| 176                                         | [K].SYNVTSVLFR.[KE]                         |                                         |                                                    |
| 177                                         | [R].NGTLVAFR.[G]                            |                                         |                                                    |
| 178                                         | [R].AFGSNPNTLK.[V]                          |                                         |                                                    |
| Glycopeptides detected only in normal serum |                                             |                                         |                                                    |
| 1                                           | [K].ICDLLVANNHFAHFFAPQNL<br>NMNK.[N]        | A0A384MD<br>V8                          | 1xCarbamidomethyl [C2];<br>1xDeamidated [N19]      |
| 2                                           | [R].TAGWNVPIGTLRPFLNWTGPP<br>EPIEAAVAR.[F]  | Q96DK0;<br>Q9NPP6;<br>P0DOX2;<br>Q8NCL6 | 1xCarbamidomethyl [C9];<br>1xDeamidated [N14]      |
| 3                                           | [R].VYLQGLIDCYLFGNSSTVLED<br>SK.[S]         | A0A161I202                              | 2xDeamidated [N3; N12]                             |
| 4                                           | [R].KLEFALLFLVFDENESWYLDD<br>NIK.[T]        | A0A0G2JPR<br>0; P0C0L5                  | 2xDeamidated [N8; N12]                             |
| 5                                           | [R].GLNVTLSSSTGRNGFK.[S]                    | A0A096LPE<br>2                          | 2xDeamidated [N4; N13]                             |
| 6                                           | [R].YAEDKFNETTEK.[S]                        | M0R0B3                                  | 1xCarbamidomethyl [C6];<br>1xDeamidated [N8]       |
| 7                                           | [K].LNVEAANWTVR.[G]                         | A0A5C2FZY<br>5                          | 2xCarbamidomethyl [C5;<br>C9]; 1xDeamidated [N3]   |
| 8                                           | [R].FSGNGSGTDFTLK.[I]                       | P14151                                  | 1xCarbamidomethyl [C3];<br>1xDeamidated [N4]       |
| 9                                           | [R].DAGVVCTNETR.[S]                         | M0R0B3;<br>Q00887;<br>P11464            | 1xDeamidated [N25]                                 |
| 10                                          | [K].IGGIWTWVGTNK.[S]                        | Q6GMX6;<br>Q7Z351                       | 1xCarbamidomethyl [C12];<br>1xDeamidated [N11]     |
| 11                                          | [K].GVNVCQETCTK.[M]                         | P08519                                  | 1xCarbamidomethyl [C23];<br>2xDeamidated [N8; N19] |



|    |                                              |                                      |                                                            |
|----|----------------------------------------------|--------------------------------------|------------------------------------------------------------|
| 12 | [R].NINYTER.[G]                              | Q8AL79                               | 1xCarbamidomethyl [C23];<br>1xDeamidated [N19]             |
| 13 | [KR].WNNTLQQIANK.[L]                         | D6RAR4                               | 1xDeamidated [N6];<br>1xOxidation [M1]                     |
| 14 | [K].EGHFYYNISEVK.[V]                         | Q96DK0;<br>A0A286YEY<br>5; Q8NCL6    | 2xDeamidated [N12; N]                                      |
| 15 | [R].CFLGNGTGYR.[G]                           | A0A8Q3SI39                           | 2xDeamidated [N6; N7]                                      |
| 16 | [R].VQPFNVTQGK.[Y]                           | P02743                               | 2xCarbamidomethyl [C1;<br>C17]; 2xDeamidated [N10;<br>N12] |
| 17 | [R].GICNSSDVR.[G]                            | B4DPP8                               | 2xCarbamidomethyl [C4;<br>C16]; 2xDeamidated [N12;<br>N14] |
| 18 | [R].RNPPMGGNVVIFDTVITNQEE<br>PYQNHSGR.[F]    | A0A1U9X79<br>3                       | 1xCarbamidomethyl [C8];<br>1xDeamidated [N15]              |
| 19 | [K].QVLFLDTVYGNCSHTFTVK.[T<br>]              | G1CX21                               | 2xCarbamidomethyl [C1;<br>C17]; 1xDeamidated [N10]         |
| 20 | [R].ESVTDHVNLITPLEKPLQNFTL<br>CFR.[A]        | A0A6M6AV<br>S1                       | 2xDeamidated [N6; N15];<br>1xOxidation [M1]                |
| 21 | [K].LHINHNNLTESVGPLPK.[S]                    | A0A5C2G3<br>W4                       | 1xCarbamidomethyl [C8];<br>1xDeamidated [N6]               |
| 22 | [R].NPNDQVFPNGTLAPSIPIWG<br>GSR.[A]          | A0A5C2GX<br>E9                       | 1xCarbamidomethyl [C5];<br>2xDeamidated [N12; N14]         |
| 23 | [K].HYLMWGLSSDFWGEKPNLSY<br>IIGK.[D]         | Q99650                               | 2xDeamidated [N2; N5]                                      |
| 24 | [K].CGLVPVLAENYNKSDNCEDT<br>PEAGYFAVAVVK.[K] | Q7Z682                               | 1xCarbamidomethyl [C8];<br>1xDeamidated [N5]               |
| 25 | [K].TELFSSSCPGGIMLNETGQGY<br>QR.[F]          | A0A0G2RK<br>F9                       | 1xCarbamidomethyl [C13];<br>1xDeamidated [N2]              |
| 26 | [R].NISDGFDPDNVDAALALPA<br>HSYSGR.[E]        | P11465                               | 2xCarbamidomethyl [C4;<br>C13]; 2xDeamidated [N9;<br>N18]  |
| 27 | [K].LGACNDTLQQLMEVFK.[F]                     | Q96DK0;<br>P0DOX2;<br>Q8NCL6         | 1xDeamidated [N6];<br>2xOxidation [M27; M32]               |
| 28 | [R].GNNSATASTITEDSGMK.[N]                    | P11465;<br>P11464;<br>Q96QL5         | 1xCarbamidomethyl [C18];<br>1xDeamidated [N16]             |
| 29 | [K].QEPERNECFLQHK.[D]                        | A0A1I9WE5<br>2                       | 2xCarbamidomethyl [C13;<br>C27]; 2xDeamidated [N8;<br>N30] |
| 30 | [K].EHETCLAPELYNGNYSTTQK.[<br>T]             | A0A024RAA<br>7                       | 1xCarbamidomethyl [C9];<br>2xDeamidated [N7; N16]          |
| 31 | [K].VQLSNDFDEYIMAIEQTIK.[S]                  | F5GXS0;<br>B7Z1F8;<br>A0A140TA4<br>4 | 1xCarbamidomethyl [C13];<br>1xDeamidated [N17]             |
| 32 | [K].VNQSLSSSNNTELRSSSNYTEL                   | F5GXS0;                              | 1xCarbamidomethyl [C10];                                   |

|                                                 |                                               |                              |                                                                    |
|-------------------------------------------------|-----------------------------------------------|------------------------------|--------------------------------------------------------------------|
|                                                 | K.[N]                                         | A0A140TA4<br>4               | 1xDeamidated [N22]                                                 |
| 33                                              | [R].FNGSGSGTDFTLK.[I]                         | P05164                       | 2xDeamidated [N7; N18]                                             |
| 34                                              | [K].TEDEADYYCQSYDSNK.[S]                      | Q96PD5                       | 2xCarbamidomethyl [C13; C27]; 1xDeamidated [N30]                   |
| 35                                              | [R].NIQNNVSCYLEGK.[Q]                         | Q86U78                       | 1xCarbamidomethyl [C14]; 1xDeamidated [N13]                        |
| 36                                              | [K].QNPSSGARLNQDK.[R]                         | A0A140VJJ6                   | 1xDeamidated [N4]; 1xOxidation [M7]                                |
| 37                                              | [R].KNGTINDNIILPCR.[I]                        | C3VUZ2                       | 1xCarbamidomethyl [C17]; 2xDeamidated [N7; N16]; 1xOxidation [M14] |
| 38                                              | [R].FQLSETNR.[T]                              | A0A5J6A018                   | 2xDeamidated [N10; N19]; 1xOxidation [M15]                         |
| 39                                              | [R].TEVSSNHVLIYLDKVSNQTLS<br>LFFTVLQDVPVR.[D] | K0GQL0                       | 2xDeamidated [N13; N22]                                            |
| 40                                              | [K].AATCINPLNGSVCERPANHSA<br>K.[Q]            | Q00887;<br>P11464;<br>Q96QL5 | 4xCarbamidomethyl [C2; C9; C17; C19]; 1xDeamidated [N5]            |
| 41                                              | [K].GLKFNLTTETSEAEIHQSFQHLL<br>R.[T]          | Q6N093;<br>Q8NF17            |                                                                    |
| 42                                              | [R].NVTNANGTSITTNSGGTNTTS<br>NAEERMVREQMK.[N] | A0A5C2GIU<br>8               |                                                                    |
| 43                                              | [K].VPGLYYFVYHASHTANLCVL<br>LYR.[S]           |                              |                                                                    |
| 44                                              | [K].DQYVEPENVTIQCDSGYGVV<br>GPQSITCSGNR.[T]   |                              |                                                                    |
| 45                                              | [R].ALLPFDNLHDDPCLLTNR.[S]                    |                              |                                                                    |
| 46                                              | [R].LEPVHLQLQCMSQEQLAQVA<br>ANATK.[E]         |                              |                                                                    |
| 47                                              | [R].RKLEFALLFLVFDENESWYLD<br>DNIK.[T]         |                              |                                                                    |
| 48                                              | [R].LQAILGVPWKDKNCTSR.[L]                     |                              |                                                                    |
| 49                                              | [R].KLPPGLLANFTLLR.[T]                        |                              |                                                                    |
| 50                                              | [K].DLQSLEDILHQVENK.[T]                       |                              |                                                                    |
| 51                                              | [K].NISISRNSSMFEEMRNCSEFNIT<br>TELK.[D]       |                              |                                                                    |
| 52                                              | [R].VLAEAMSHANSSIMMQRGNF<br>R.[N]             |                              |                                                                    |
| 53                                              | [K].VSEHIPVYQQUEENQTDVWTL<br>LNGSK.[D]        |                              |                                                                    |
| 54                                              | [R].HCDGNVSSCGDHPSEGCF<br>CPPDK.[V]           |                              |                                                                    |
| 55                                              | [R].KAHCEINETQWNDILGQVAK.<br>[K]              |                              |                                                                    |
| 56                                              | [K].ISNFTNKNMKEVK.[K]                         |                              |                                                                    |
| 57                                              | [R].FSASGSGTNFTLLR.[I]                        |                              |                                                                    |
| Glycopeptides detected only in PE patient serum |                                               |                              |                                                                    |

|    |                                                       |                                         |                                                                          |
|----|-------------------------------------------------------|-----------------------------------------|--------------------------------------------------------------------------|
| 1  | [K].YRLINCNTSTITQACPKVSFDP<br>IPIHYCAPAGFAILKCNNK.[T] | P0DOX2;<br>Q8NCL6                       | 4xCarbamidomethyl [C6;<br>C15; C28; C38];<br>2xDeamidated [N5; N7]       |
| 2  | [K].TDCPELAVENASLNCSSDR.[<br>Y]                       | A0A384MR0<br>3; P02751                  | 2xDeamidated [N6; N16]                                                   |
| 3  | [R].FNFDGGECDDPEITNVTQTCF<br>DPDSPHR.[A]              | W0G7N9                                  | 3xCarbamidomethyl [C8; C9;<br>C20]; 1xDeamidated [N15]                   |
| 4  | [R].DQCIVDDITYNVNDTFHK.[R]                            | B4DVE1                                  | 1xCarbamidomethyl [C3];<br>1xDeamidated [N13]                            |
| 5  | [K].ELFPNGTIQFNASSGGDLEITT<br>HIFNC.[-]               | J9QLY4                                  | 1xCarbamidomethyl [C27];<br>1xDeamidated [N5]                            |
| 6  | [K].GLEWIGEIYHSGSINYNPSLK.[<br>S]                     | A0A7S5BX<br>W1                          | 2xDeamidated [N15; N17]                                                  |
| 7  | [R].LEDLEVTGSSFLNLSTNIFSNL<br>TSLGK.[L]               | Q8AE58                                  | 2xDeamidated [N17; N21]                                                  |
| 8  | [R].IGPGQAFFTSDIIGDIRQAHCN<br>VSKSAWNETLQQVVK.[Q]     | F5GXS0;<br>B7Z1F8;<br>A0A140TA3<br>2    | 1xCarbamidomethyl [C21];<br>1xDeamidated [N29]                           |
| 9  | [K].VPGNVTAVLGETLK.[V]                                | Q96QJ4                                  | 2xCarbamidomethyl [C8;<br>C9]; 1xDeamidated [N1]                         |
| 10 | [K].NVTSESTCCVAK.[S]                                  | Q6N096                                  | 2xCarbamidomethyl [C1;<br>C4]; 1xDeamidated [N3]                         |
| 11 | [K].EFYVDQNVSIK.[C]                                   | Q12841                                  | 1xCarbamidomethyl [C20];<br>1xDeamidated [N]                             |
| 12 | [R].NDTLEWENQQR.[L]                                   | P02751                                  | 1xCarbamidomethyl [C23];<br>3xDeamidated [N3; N7;<br>N16]                |
| 13 | [K].GSNYSEILDK.[Y]                                    | Q96DK0;<br>Q9NPP6;<br>Q96K68;<br>Q8NCL6 | 2xCarbamidomethyl [C3;<br>C15]; 2xDeamidated [N10;<br>N14]               |
| 14 | [R].WTPLNSSTIIGYR.[I]                                 | Q9YSZ6                                  | 2xCarbamidomethyl [C13;<br>C18]; 1xDeamidated [N]                        |
| 15 | [K].CGNCSLTTLK.[D]                                    | P11464;<br>M0R276                       | 1xCarbamidomethyl [C5];<br>2xDeamidated [N8; N20];<br>1xOxidation [M37]  |
| 16 | [R].SQNLSDNAKIIIVHLNESVEIN<br>CTGPGNNTRRSIHIGPNR.[A]  | Q16557;<br>Q15228;<br>P11464;<br>Q8WYY6 | 1xCarbamidomethyl [C29];<br>1xDeamidated [N]                             |
| 17 | [R].GTINCLSNITGIILTRDGGNNIK<br>NNKTEIFRPGGGDMK.[D]    | A0A0R6D66<br>8                          | 2xDeamidated [N13; N17]                                                  |
| 18 | [R].VTMSVDTSKNQFSLNLSSVTA<br>ADTAIYYCAR.[H]           | A0A5C2GH5<br>1                          | 1xCarbamidomethyl [C7];<br>2xDeamidated [N12; N13];<br>1xOxidation [M20] |
| 19 | [R].VYLQGLIDYYLFGNSSTVLED<br>SK.[S]                   | B4DGC3                                  | 3xDeamidated [N6; N7;<br>N18]                                            |
| 20 | [K].GAVQINCTRPNNNTRKSIHMG                             | B2R5G8                                  | 1xCarbamidomethyl [C14];                                                 |

|    |                                                      |                             |                                                                         |
|----|------------------------------------------------------|-----------------------------|-------------------------------------------------------------------------|
|    | PGR.[T]                                              |                             | 3xDeamidated [N11; N15; N21]                                            |
| 21 | [R].YTTFEYPNTINFSCNTGFYLNG ADSAK.[C]                 | D2XT44                      | 1xCarbamidomethyl [C1]; 1xDeamidated [N15]                              |
| 22 | [K].TLYETEVEFSTDFSNISAAK.[Q]                         | B4DPN0                      | 2xDeamidated [N6; N11]                                                  |
| 23 | [R].CSDGWSFDATTLDDNGTMLF FK.[G]                      | P05543                      | 1xCarbamidomethyl [C16]; 1xDeamidated [N19]; 1xOxidation [M5]           |
| 24 | [R].AGKAMYAPPIRGKIECVSNIT GLMLTR.[D]                 | Q49GB3                      | 2xDeamidated [N5; N8]                                                   |
| 25 | [K].NLSAIWDNMTWMEWEREINN YTGLIYSLIAESQNQQEK.[N]      | B4DPN0; D9IWP9              | 2xDeamidated [N18; N31]; 1xOxidation [M28]                              |
| 26 | [R].FSGSGSDTNFTLTISR.[V]                             | A0A193L127                  | 1xAcetyl [N-Term]; 1xCarbamidomethyl [C6]; 2xDeamidated [N10; N11]      |
| 27 | [R].SNITGLLLTRDGGNNNTNETF RPLGGDMRDNRSELYR.[Y]       | A0A5C2GW P7                 | 1xCarbamidomethyl [C26]; 3xDeamidated [N27; N34; N35]; 1xOxidation [M5] |
| 28 | [-].SVQIVCTRPNNTR.[K]                                | W0GBR4                      | 2xCarbamidomethyl [C2; C6]; 1xDeamidated [N5]                           |
| 29 | [R].FQLLNFSSELK.[V]                                  | C6GG66                      | 1xCarbamidomethyl [C6]; 2xDeamidated [N13; N15]                         |
| 30 | [R].KSIHMGPSTFYATGAIIGDIR QAHCNLSRADWNNTLNQIATK.[L ] | X5D8W0                      | 1xCarbamidomethyl [C13]; 1xDeamidated [N10]                             |
| 31 | [K].NCGVNCSGDVFTALIGEIASP NYPKYPENS.[C]              | P0DOX5                      | 3xCarbamidomethyl [C7; C8; C17]; 1xDeamidated [N]                       |
| 32 | [R].KEHETCLAPELYNGNYSTTQK .[T]                       | Q9UIR5                      | 1xCarbamidomethyl [C10]; 1xDeamidated [N]                               |
| 33 | [K].GLEWIGEIYHNGTSNYNPSLK. [S]                       | D1L7D2                      | 3xCarbamidomethyl [C7; C8; C17]; 2xDeamidated [N6; N11]                 |
| 34 | [R].AVYAPPIAGNITCKSNITGLLL THDGSNNATLIFRPGGGDMR.[D]  | A0A286YEY 5; Q8NCL6; Q6P089 | 1xCarbamidomethyl [C7]; 1xDeamidated [N6]                               |
| 35 | [R].SDFASNCCSINSPPLYCDSEID AELK.[N]                  | P11464; Q96QL5              | 1xCarbamidomethyl [C5]; 1xDeamidated [N3]                               |
| 36 | [K].EFYLFPTVFDENESLLEDNIR. [M]                       | P09871                      |                                                                         |
| 37 | [K].DVQIIVFPEDGIHGFNFTR.[T]                          | A0A7S5EW V5                 |                                                                         |
| 38 | [K].EDAAVNCTDISVQK.[T]                               | C9EBH2                      |                                                                         |
| 39 | [K].VDGLKWNETLEK.[V]                                 | A0A8Q3WK W7; A8K5T0         |                                                                         |
| 40 | [K].TLNICEVGTIR.[C]                                  | P11464; Q96QL5; M0R276      |                                                                         |
| 41 | [R].VITVQVANFTLR.[L]                                 | H0YGZ7                      |                                                                         |
| 42 |                                                      | A0MT85                      |                                                                         |

|    |  |        |  |
|----|--|--------|--|
| 43 |  | P13671 |  |
|----|--|--------|--|

**Table S5.** Gene ontology analysis of PE associated differentially expressed proteins.

| Analysis           | Pathway               | Protein Group Accessions | Protein Names                                      | Official Gene Symbol |
|--------------------|-----------------------|--------------------------|----------------------------------------------------|----------------------|
| Molecular Function | Heparin binding       | P19801                   | Amine oxidase copper containing 1                  | AOC1                 |
|                    |                       | C0JYY2                   | Apolipoprotein B                                   | APOB                 |
|                    |                       | P00734                   | Coagulation factor II, thrombin                    | F2                   |
|                    |                       | P03951                   | Coagulation factor XI                              | F11                  |
|                    |                       | A0A8Q3W KW7              | Complement factor H                                | CFH                  |
|                    |                       | P02751, A0A024R46 2      | Fibronectin 1                                      | FN1                  |
|                    |                       | Q12841                   | Follistatin like 1                                 | FSTL1                |
|                    |                       | D3DNU8                   | Kininogen 1                                        | KNG1                 |
|                    |                       | P13727                   | Proteoglycan 2, pro eosinophil major basic protein | PRG2                 |
|                    |                       | P01008                   | Serpin family C member 1                           | SERPINC1             |
|                    |                       | P05546                   | Serpin family D member 1                           | SERPIND1             |
|                    |                       | P07996                   | Thrombospondin 1                                   | THBS1                |
|                    |                       | D9ZGG2                   | Vitronectin                                        | VTN                  |
| Biological Process | Complement activation | X6RLJ0                   | complement C1q A chain                             | C1QA                 |
|                    |                       | F2Z3N2                   | complement C2                                      | C2                   |
|                    |                       | P01024                   | complement C3                                      | C3                   |
|                    |                       | A0A140TA3 2              | complement C4A (Rodgers blood group)               | C4A                  |
|                    |                       | P20851                   | complement C4B (Chido blood group)                 | C4B                  |
|                    |                       | P13671                   | complement C6                                      | C6                   |
|                    |                       | A0A8Q3W KN4              | complement C8 alpha chain                          | C8A                  |

|  |                                                                     |                |                               |                   |
|--|---------------------------------------------------------------------|----------------|-------------------------------|-------------------|
|  |                                                                     | A0A024R03<br>5 | complement C9                 | C9                |
|  |                                                                     | A0A8V8TQ<br>26 | complement factor H related 1 | CFHR1             |
|  |                                                                     | A0A8V8TQ<br>26 | complement factor H           | CFH,<br>hCG_40889 |
|  |                                                                     | Q6UY50         | ficolin 3(FCN3)               | UNQ172            |
|  | Positive<br>regulation of<br>immune<br>response                     | P13671         | complement C6                 | C6                |
|  |                                                                     | A0A8Q3W<br>KN4 | complement C8 alpha chain     | C8A               |
|  |                                                                     | A0A024R03<br>5 | complement C9                 | C9                |
|  | Positive<br>regulation of<br>tumor necrosis<br>factor<br>production | P02763         | orosomuroid 1                 | ORM1              |
|  |                                                                     | P19652         | orosomuroid 2                 | ORM2              |
|  |                                                                     | P07996         | thrombospondin 1              | THBS1             |
